# Supplementary material for: Instant synthesis of nitrogen-doped Ti 3 C 2 MXene quantum dots for fluorescence and electrochemical dual-mode detection of norepinephrine with a portable smartphone assay
Source: Royal Society of Chemistry journal article supplement (doi:10.1039/d4tb01818d), 2024-11-18
Supplement: d4tb01818d1.pdf [file d4tb01818d1.pdf]

**Instant synthesis of nitrogen-doped Ti<sub>3</sub>C<sub>2</sub> MXene quantum dots for  
fluorescence and electrochemical dual-mode detection of norepinephrine  
with a portable smartphone assay**

Murugesan Chandran, Gayathri Chellasamy, Mekala Veerapandian, Barkavi Dhanasekaran, Saravanan  
Govindaraju\*, Kyusik Yun\*

Department of Bionanotechnology, Gachon University, Gyeonggi-do 13120, Republic of Korea

**AUTHOR INFORMATION**

**Corresponding Authors**

\*E-mail: [ykyusik@gachon.ac.kr](mailto:ykyusik@gachon.ac.kr) (K.Yun.), [biovijaysaran@gmail.com](mailto:biovijaysaran@gmail.com) (S.G.)

**Table S1.** Analytical results of NE in spiked human serum sample using PL (Added concentration,

| <b>Samples</b> | <b>Added concentration<br/>(<math>\mu\text{M}</math>)</b> | <b>Found concentration<br/>(<math>\mu\text{M}</math>)</b> | <b>Recovery (%)</b> | <b>RSD</b> |
|----------------|-----------------------------------------------------------|-----------------------------------------------------------|---------------------|------------|
| 1              | 0.1                                                       | 0.097                                                     | 97.86               | 1.73       |
| 2              | 0.5                                                       | 0.50                                                      | 100.84              | 0.72       |
| 3              | 5                                                         | 4.98                                                      | 99.67               | 1.13       |
| 4              | 25                                                        | 24.95                                                     | 99.81               | 1.49       |
| 5              | 100                                                       | 99.62                                                     | 99.62               | 0.92       |
| 6              | 500                                                       | 511.39                                                    | 102.27              | 2.08       |

Found concentration, Recovery %, RSD)

| Samples | Added concentration (μM) | Found concentration (μM) | Recovery (%) | RSD  |
|---------|--------------------------|--------------------------|--------------|------|
| 1       | 0.1                      | 0.097                    | 97.86        | 1.73 |
| 2       | 0.5                      | 0.50                     | 100.84       | 0.72 |
| 3       | 5                        | 4.98                     | 99.67        | 1.13 |
| 4       | 25                       | 24.95                    | 99.81        | 1.49 |
| 5       | 100                      | 99.62                    | 99.62        | 0.92 |
| 6       | 500                      | 511.39                   | 102.27       | 2.08 |

**Table S2.** Analytical results of NE in spiked human serum sample using DPV (Added concentration, Found concentration, Recovery %, RSD)

| S. No. | Nanomaterials                                  | Analytical methods     | Linear range           | LOD                                     | Ref.             |
|--------|------------------------------------------------|------------------------|------------------------|-----------------------------------------|------------------|
| 1      | PNC                                            | Colorimetric           | 0.2-19 $\mu\text{M}$   | 126 nM                                  | 1                |
| 2      | Bifunctionalized AuNPs                         | Colorimetric           | 0-1500 $\mu\text{M}$   | 0.07 $\mu\text{M}$                      | 2                |
| 3      | MA-Ir NPs                                      | Colorimetric           | 0.1-120 $\mu\text{M}$  | 50 nM                                   | 3                |
| 4      | N-CNPs                                         | Fluorescence           | 0.1-100 $\mu\text{M}$  | 91 nM                                   | 4                |
| 5      | Cy-TPC                                         | Fluorescence           | 0-7000 $\mu\text{M}$   | 5.01 $\mu\text{M}$                      | 5                |
| 6      | LNE probe                                      | Fluorescence           | 0-5 $\mu\text{M}$      | 40 $\mu\text{M}$                        | 6                |
| 7      | AgNPs                                          | SERS                   | 0-1 mM                 | 10 $\mu\text{M}$                        | 7                |
| 8      | AuNP                                           | SERS                   | 32-80 $\mu\text{g/mL}$ | -                                       | 8                |
| 9      | MF NPs                                         | Electrochemical        | 0.03–500 $\mu\text{M}$ | 0.02 $\mu\text{M}$                      | 9                |
| 10     | 1@CFMCN/GCE                                    | Electrochemical        | 2-1000 $\mu\text{M}$   | 1.5 $\mu\text{M}$                       | 10               |
| 11     | GQDs/AuNPs/GCE                                 | Electrochemical        | 0.5-7.5 $\mu\text{M}$  | 0.150 $\mu\text{M}$                     | 11               |
| 12     | CoFe <sub>2</sub> O <sub>4</sub> @NiO/ EMIM Ac | Electrochemical        | 10-500 $\mu\text{M}$   | 2.26 $\mu\text{M}$                      | 12               |
| 13     | <b>N-MQDs</b>                                  | <b>Fluorescence</b>    | <b>0.1-500</b>         | <b>37 nM (PBS)</b><br><b>40 nM (HS)</b> | <b>This work</b> |
|        | <b>N-MQDs/GCE</b>                              | <b>Electrochemical</b> | <b>0.1-500</b>         | <b>54 nM (PBS)</b><br><b>33 nM (HS)</b> |                  |

**Table S3.** Comparison study for proposed NE detection with other reported sensors (Nanomaterials used for detection, analytical methods, linear range, LOD).

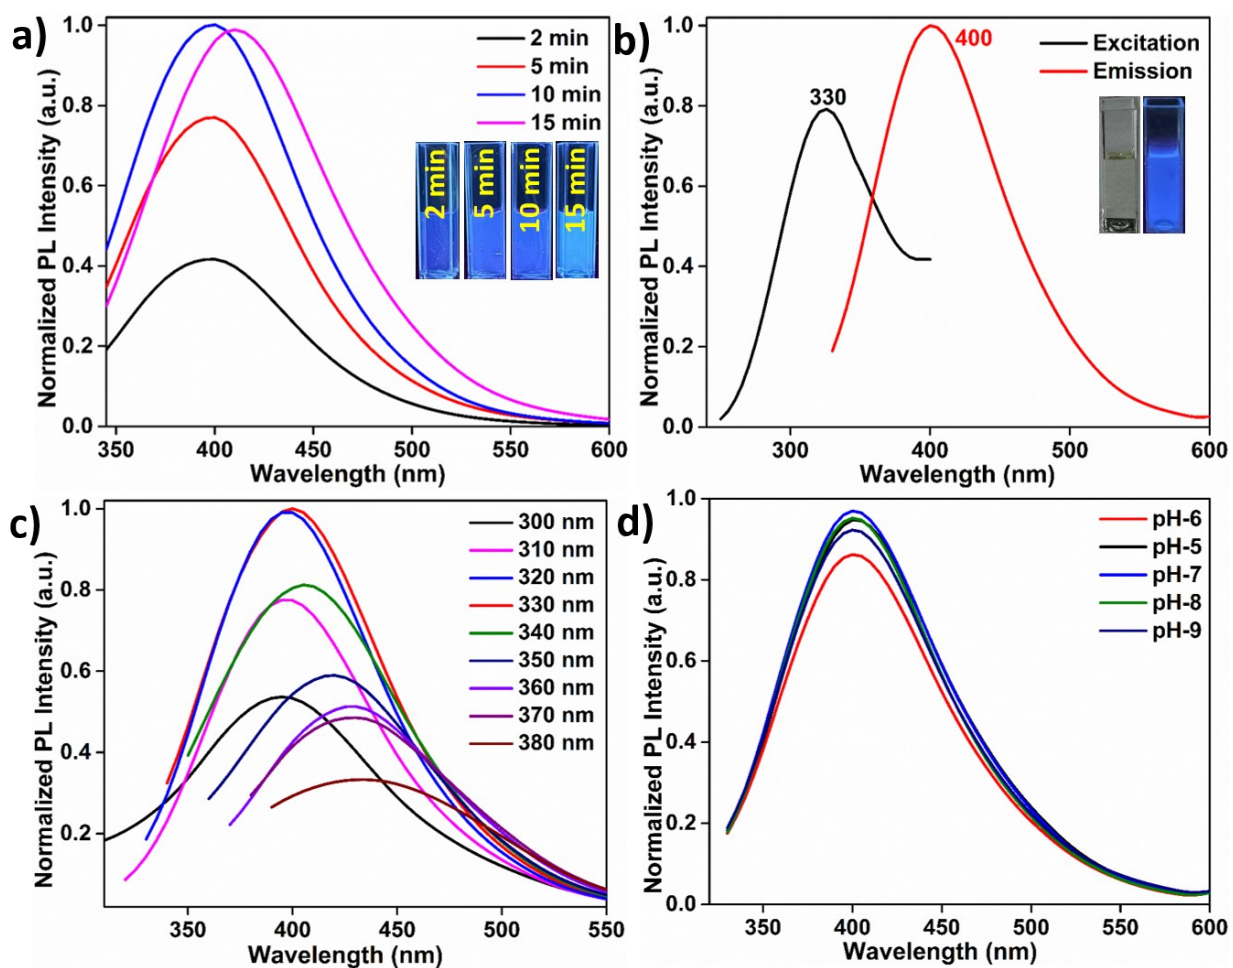

**Fig. S1.** a) PL spectrum of N-MQDs at different microwave irradiation times from 2-15 min (Inset: microwave synthesized N-MQDs samples under 365 nm UV light), b) Excitation and emission spectrum of N-MQDs (Inset: 5-min synthesized N-MQDs sample in daylight and under 365 nm UV light), c) excitation-dependent emission spectrum of N-MQDs, d) Effect of different pH (6-9) for the fluorescence intensity of N-MQDs.

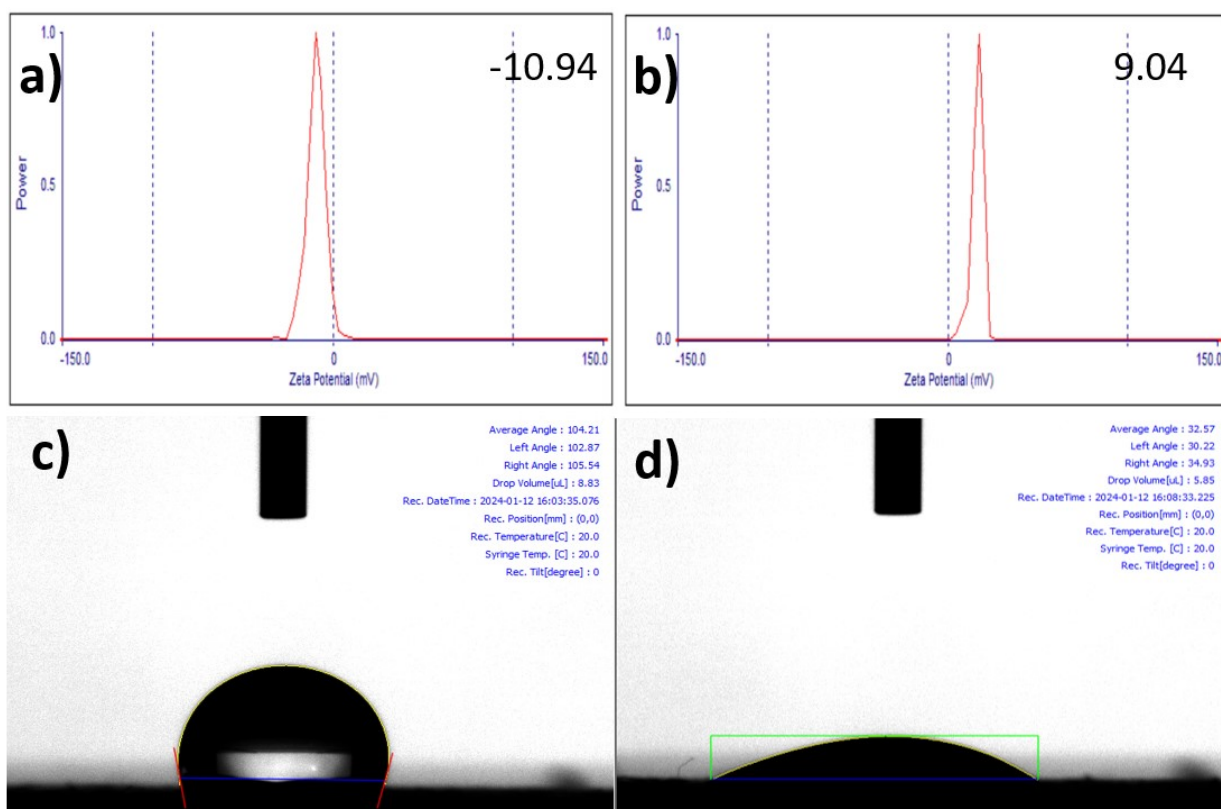

**Fig. S2.** Zeta potential and contact angel analysis of N-MQDs a) Zeta potential of N-MQDs, b) Zeta potential of N-MQDs with NE c) contact angel analysis of bare carbon paper electrode d) N-MQDs modified carbon paper electrode.

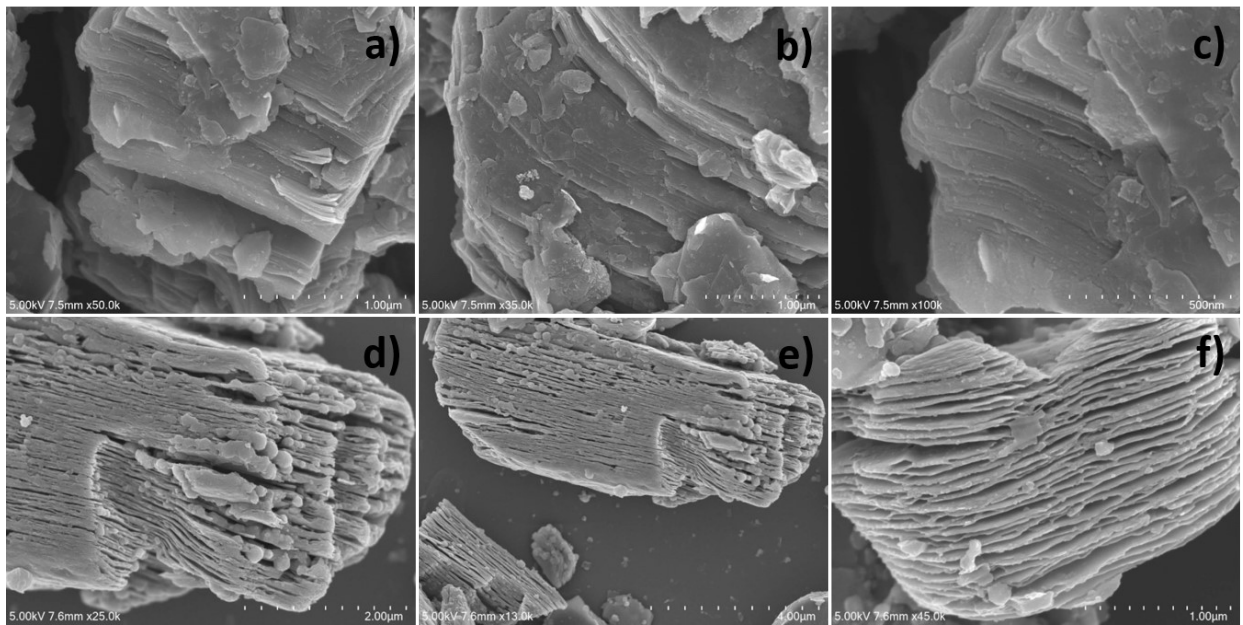

**Fig. S3.** a-c) SEM images of the MAX phase at different magnifications, d-f) SEM images of HF etched MXene at different magnifications.

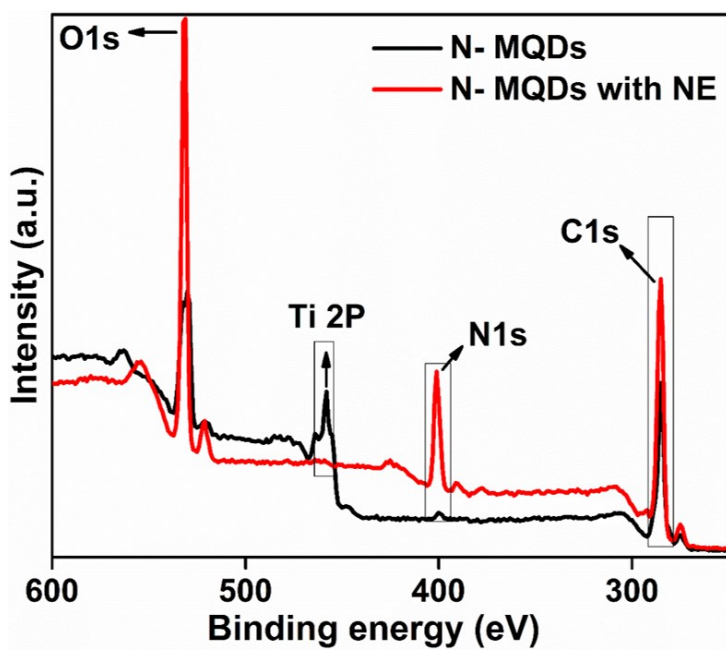

Fig. S4. XPS survey spectrum of N-MQDs (block) and N-MQDs with NE (red).



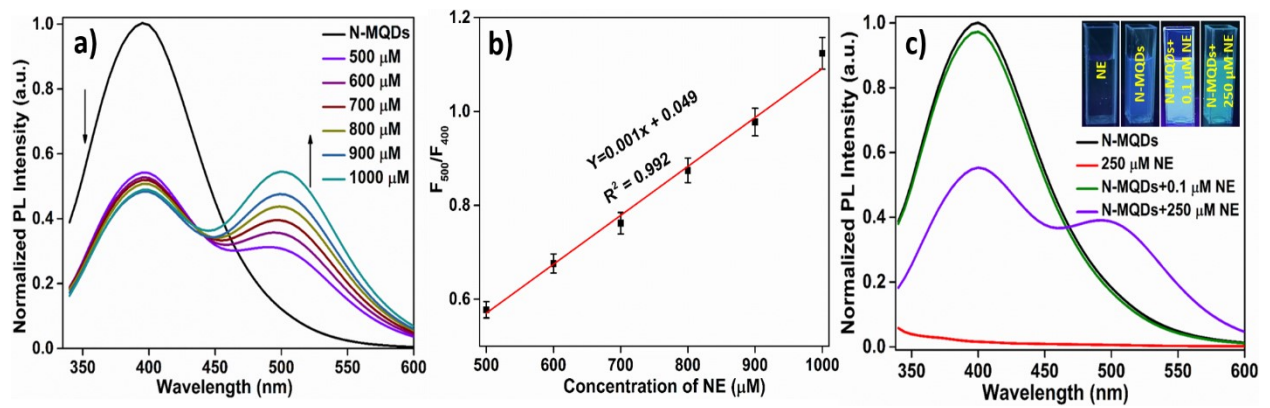

**Fig. S5.** a) PL spectrum of N-MQDs and 500 to 1000  $\mu\text{M}$  of NE samples, b) The linear relationship between  $F_{500}/F_{400}$  ratio of the MQDs and the concentration of NE, c) The PL spectrum of NE, N-MQDs, and N-MQDs with 0.1 and 250  $\mu\text{M}$  of NE samples (Inset: NE, N-MQDs, N-MQDs with 0.1 and 250  $\mu\text{M}$  of NE samples under 365 nm UV light).

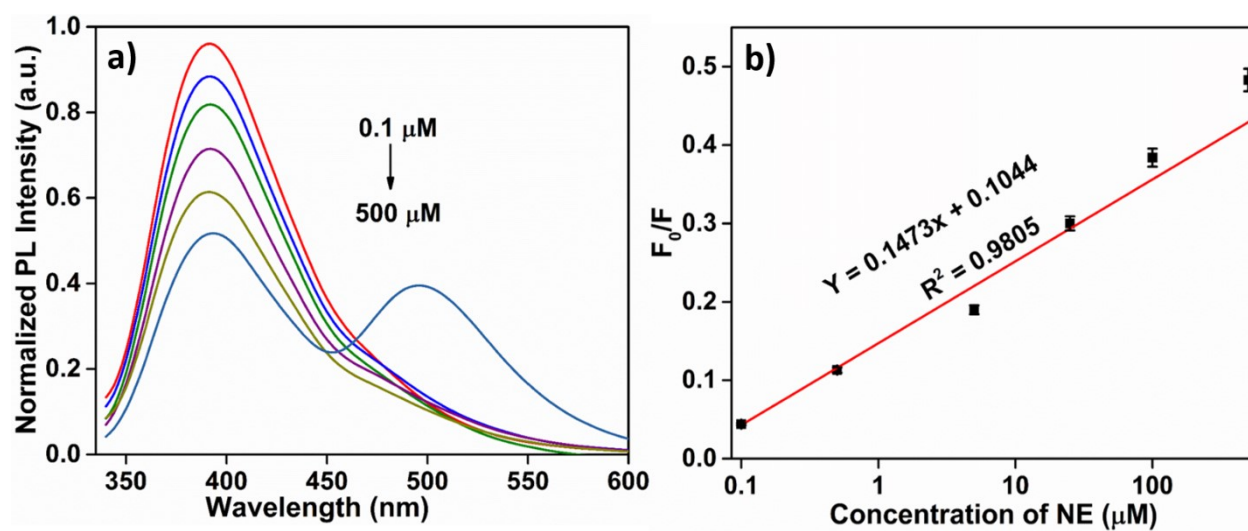

**Fig. S6.** a) PL spectrum of N-MQDs in the presence of different concentrations of NE from 0.1 to 500  $\mu\text{M}$  were spiked with serum sample, b) corresponding linear regression plot.

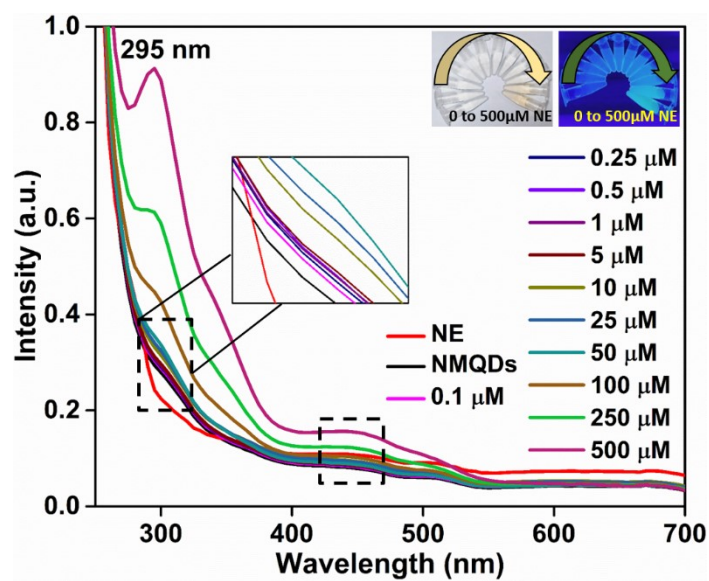

**Fig. S7.** The UV-visible spectrum of NE, N-MQDs, and N-MQDs with different concentrations of NE from 0.1 to 500  $\mu\text{M}$ . (Inset: N-MQDs with different concentrations of NE (0 to 500  $\mu\text{M}$ ) sample in daylight and under 365 nm UV light).

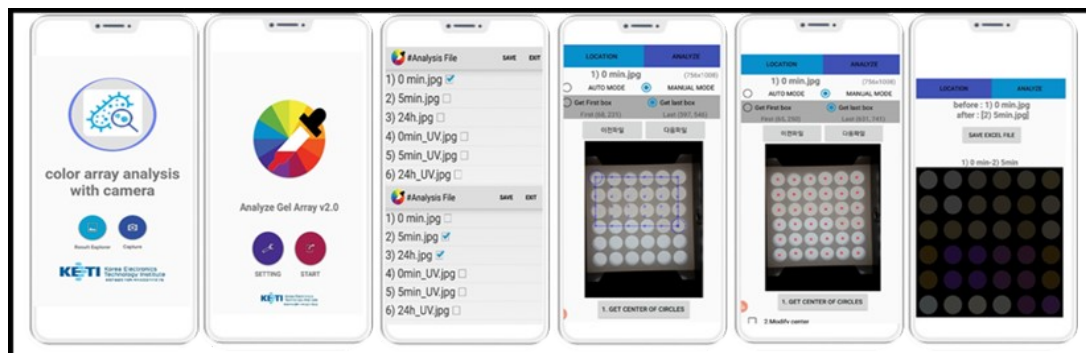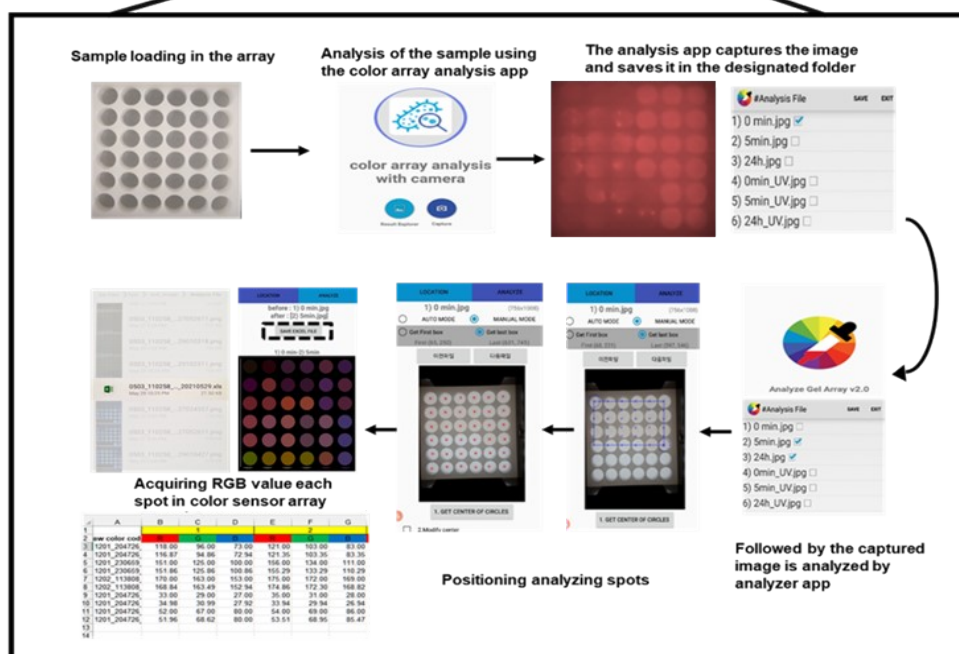

Fig. S8. The step-wise analysis of NE samples using the smartphone-based application.

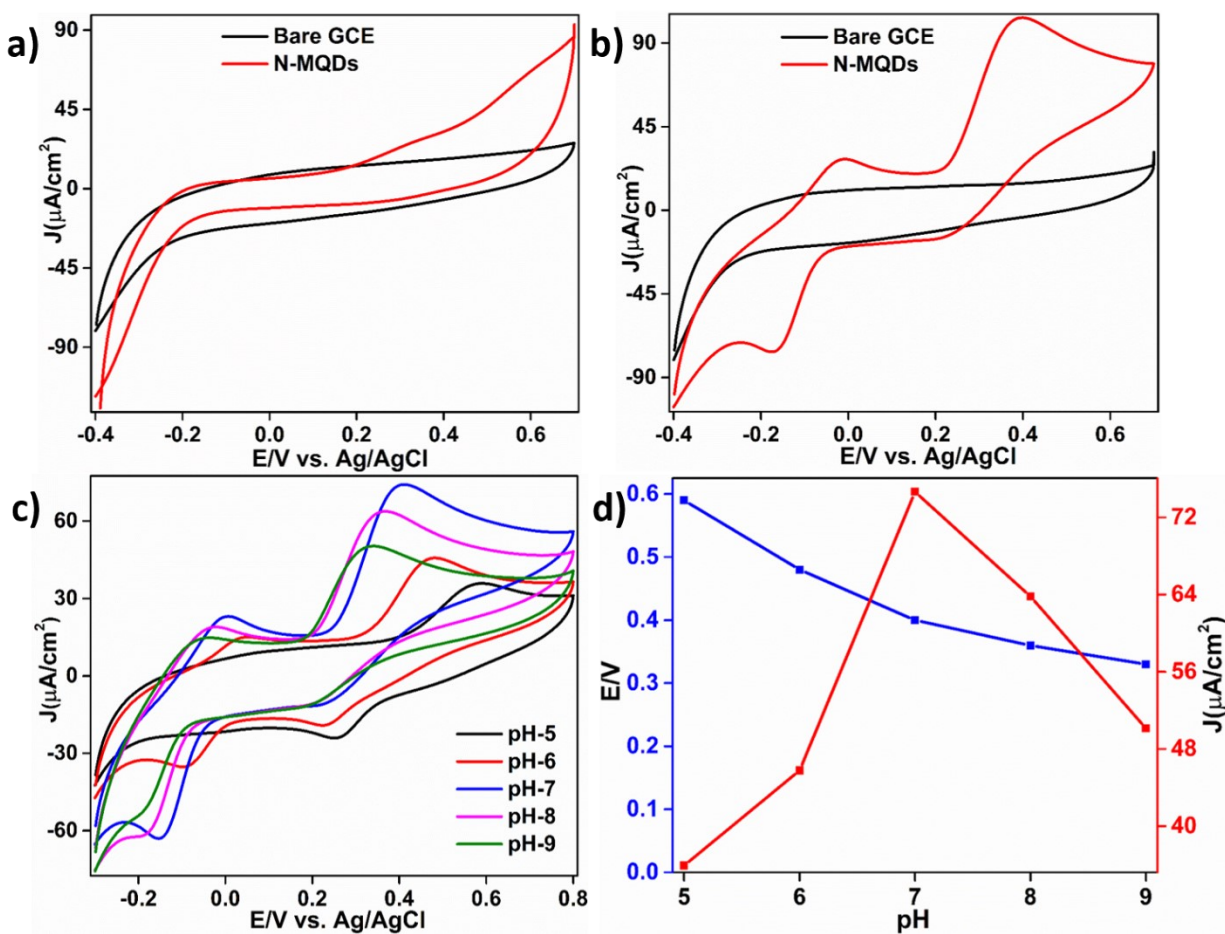

**Fig. S9.** a) CV of bare GCE and N-MQDs modified GCE in the absence of NE (using PBS, pH = 7.0), b) CV of bare GCE and N-MQDs modified GCE in the presence of NE (using PBS, pH = 7.0), c) Effect of pH (5-9) on N-MQDs modified GCE in 25  $\mu M$  NE sample in PBS using CV, d) corresponding calibration curve with respect to potential and current.

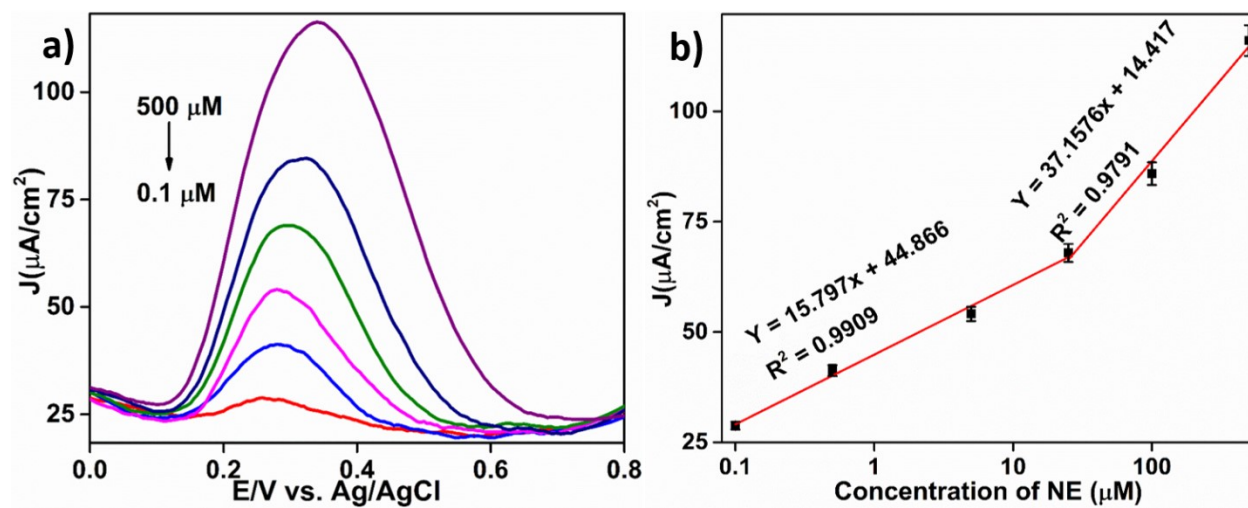

**Fig. S10.** a) DPV analysis of N-MQDs modified GCE in the presence of spiked serum in different concentrations of NE (0.1 to 500 μM), b) corresponding linear regression plot.

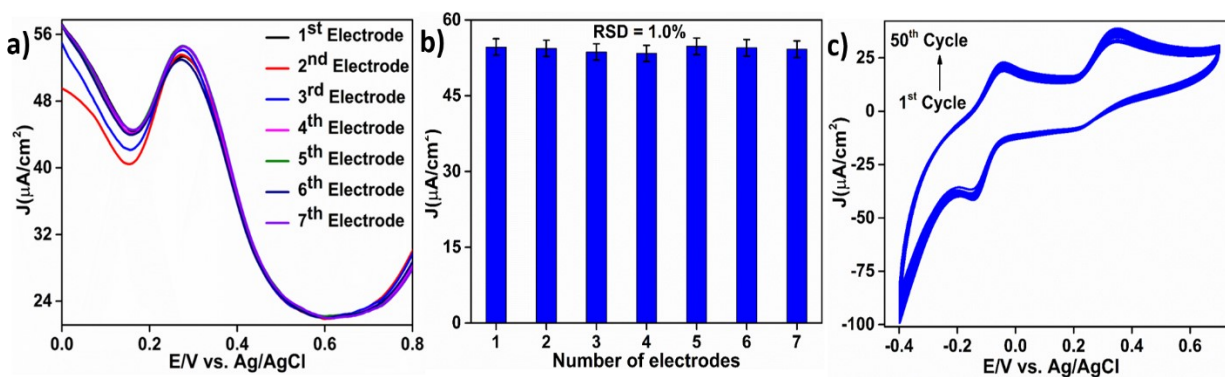

**Fig. S11.** Reproducibility and stability of NE detection a) reproducibility of N-MQDs modified GCE towards NE detection, b) corresponding bar chart c) stability studies of N-MQDs modified GCE for the detection of NE sample using CV over 50 cycles.

## References

---

- 1 S.E. Son, E. Ko, V.K. Tran, W. Hur, H. Choi, H.B. Lee, Y. Park and G.H. Seong, *ChemElectroChem.*, 2019, **6**, 4666-4673.
- 2 T.M. Godoy-Reyes, A.M. Costero, P. Gavina, R. Martinez-Manez and F. Sancenon, *ACS Appl. Nano Mater.*, 2019, **2**, 1367-1373.
- 3 X. Chen, L. Zhou, Z. Guo and Q. Song, *Mater. Adv.*, 2024, **5**, 1332-1339.
- 4 D. Das and R.K. Dutta, *Dyes Pigm.*, 2022, **203**, 110314.
- 5 F. Zhang, Y.A. Song, H. Yan, H. Yang, Z. Liu, Z. Li, P. Zhang and C. Ding, *Sens Actuators B Chem.*, 2024, 136182.
- 6 P. Gu, L. Li, A. Fu, H. Song, B. Zhao, L. Wei, L. Ji, W. Li, R. Zhang, Q. Wang and G. He, *Bioorg. Chem.*, 2023, **131**, 106306.
- 7 A. Hariharan and P. Vadlamudi, *Mater. Today Commun.*, 2021, **27**, 102429.
- 8 A. Dowek, M. Berge and P. Prognon, *Anal. Bioanal. Chem.*, 2022, **414**, 1163–1176
- 9 S. Jafarei, H. Asadollahzadeh, N. Rastakhiz, M. Ghazizadeh and S.Z. Mohammadi, *J. Mater. Sci.: Mater. Electron.*, 2022, **33**, 11813-11824.
- 10 M. Liu, Y. Zhang, J. Jiang, D. Wang, Y. Li, J. Zhao and L. Chen, *J. Rare Earths.*, 2022, **40**, 1785-1793.
- 11 A. Fajardo, D. Tapia, J. Pizarro, R. Segura and P. Jara, *J. Appl. Electrochem.*, 2019, **49**, 423-432.
- 12 R. Mostafazadeh, Y. Hamidian, N. Erk and E.N. Dragoi, *Carbon Letters*, 2023, **33**, 1827-1837.
